# Supplementary material for: Avian tail ontogeny, pygostyle formation, and interpretation of juvenile Mesozoic specimens
Source: PubMed Central journal article supplement (PMC5997987; doi:10.1038/s41598-018-27336-x), 2018-06-13
Supplement: 41598_2018_27336_MOESM1_ESM.pdf [file 41598_2018_27336_MOESM1_ESM.pdf]

## Supplementary Information

### Avian tail ontogeny, pygostyle formation, and interpretation of juvenile Mesozoic specimens

**Authors:** Dana J. Rashid, Kevin Surya, Luis M. Chiappe, Nathan Carroll, Kimball L. Garrett, Bino Varghese, Alida Bailleul, Jingmai K. O'Connor, Susan C. Chapman, and John R. Horner

Supplemental data for this study includes two tables and one figure. Note that Supplementary Table 1 is a separate excel file with multiple tabs.

**Supplementary Figure 1. Fusion of pygostyle vertebrae occurs as a post-hatching event across extant bird clades.** MicroCT (in greyscale) and digital photographs (in color) of juvenile and adult distal tails were compared for their relative degree of pygostyle fusion. All tails are distal to the left, proximal to the right, and not to scale. White arrowheads indicate unfused pygostyle vertebral junctions; open arrowheads indicate possible unfused pygostyle vertebral junctions, and white bars indicate the extent of the pygostyle region. The proximal boundaries of the juvenile pygostyles are estimated from adult dimensions and morphological features. **A**, paleognathous birds; **Aa-Ac**, emu *Dromaius novaehollandiae*, surface sagittal views; **Aa**, 3.5 month old; **Ab**, 5.5 month old; **Ac**, adult, MOR 186; **Ad-Af**, elegant crested tinamou, *Eudromia elegans*; **Ad**, juvenile, surface sagittal view, LACM 85562; **Ae**, same specimen as in Ad, mid-sagittal view, yellow arrow indicates spinal cord channel; **Af**, adult, surface sagittal view, LACM 116227. **B**, galloanseriform birds, surface sagittal views; **Ba-Ba'**, mallard duck *Anas platyrhynchos*; **Ba**, juvenile, LACM 110758; **Ba'**, adult, MOR 1158; **Bb-Bb'**, domestic chicken *Gallus gallus*; **Bb**, 7-8 week old juvenile; **Bb'**, 1.5 year old adult; **Bc-Bc'**, bush quail, *Perdica asiatica*; **Bc**, juvenile, LACM 85646; **Bc'**, adult, LACM 90214. **C**, neoaves; **Ca-Ca'**, California scrub jay, *Aphelocoma californica*; **Ca**, juvenile, LACM 111600; **Ca'**, adult, LACM 119559; **Cb-Cb'**, least sandpiper, *Calidris minutilla*; **Cb**, juvenile LACM 80368; **Cb'**, adult, LACM 113110; **Cc-Cc'**, lesser nighthawk, *Chordeiles acutipennis*; **Cc**, juvenile, LACM 11218; **Cc'**, adult, LACM 73857; **Cd-Cd'**, sunbittern, *Eurypyga helias*; **Cd**, juvenile LACM 104451; **Cd'**, adult, LACM 90009; **Ce-Ce'**, Wilson's snipe, *Gallinago delicata*; **Ce**, juvenile, LACM 80241; **Ce'**, adult, LACM 113137; **Cf-Cf'**, western screech owl, *Megascops kennicotti*; **Cf**, juvenile LACM 111461; **Cf'**, adult LACM 105612; **Cg-Cg'**, red-headed woodpecker, *Melanerpes erythrocephalus*; **Cg**, juvenile LACM 6313; **Cg'**, adult LACM 118444; **Ch-Ch'**, Humboldt penguin, *Spheniscus humboldti*; **Ch**, juvenile LACM 888834; **Ch'**, adult LACM 116234; **Ci-Ci''**, elegant tern, *Thalasseus elegans*; **Ci**, young chick, the caudal vertebrae are still in the process of ossifying, C is centrum and NA is neural arch, LACM 109304; **Ci'**, fledgling near adult size, LACM 116139; **Ci''**, adult LACM 117720.

## A. Paleognaths

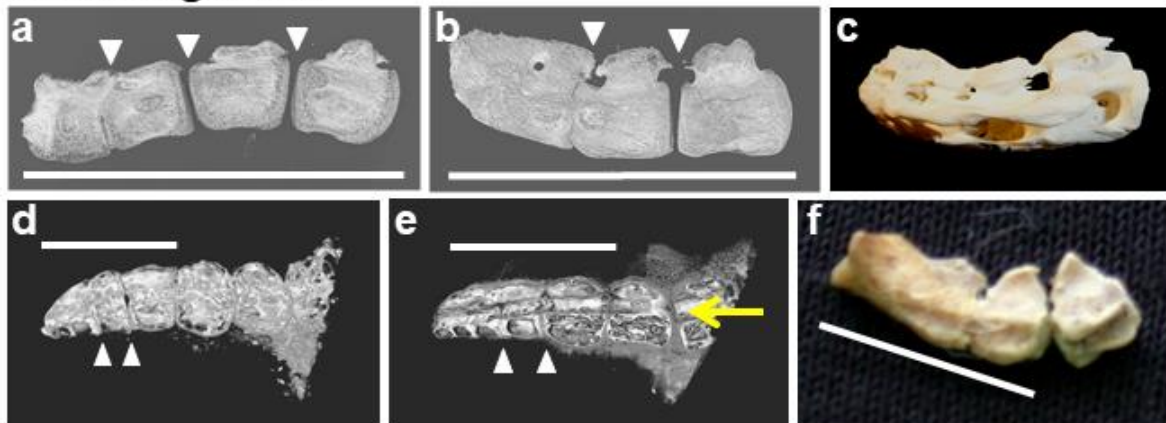

## B. Galloanseriforms

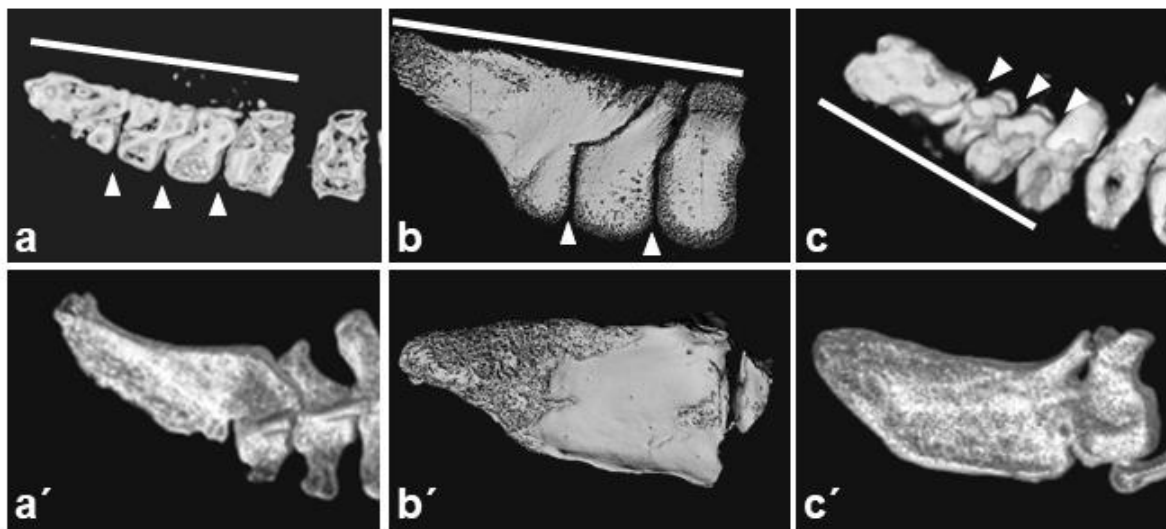

C. Neoaves

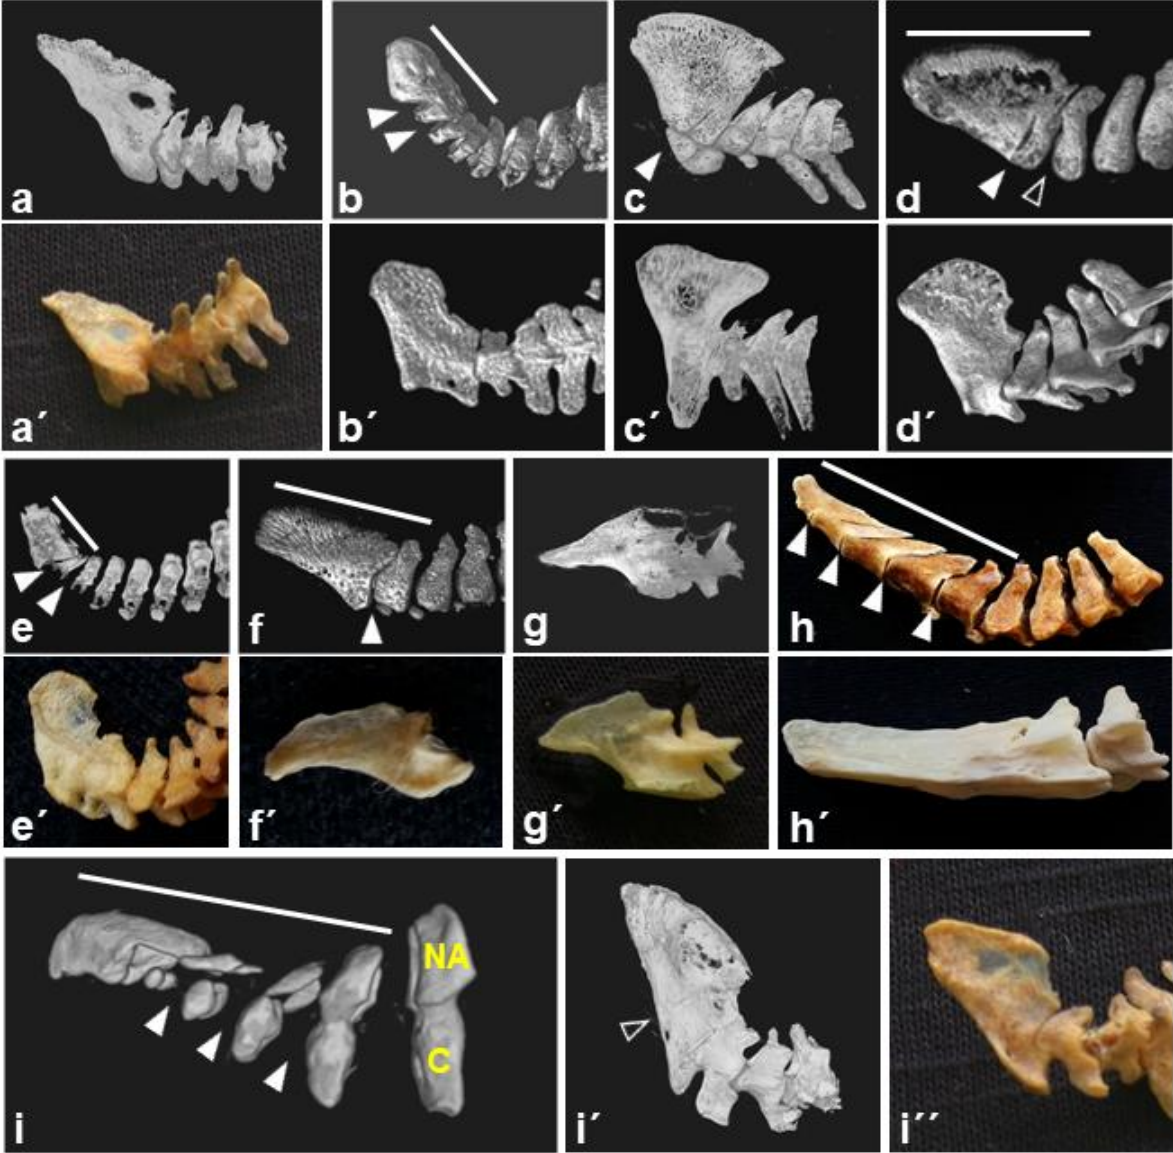

**Supplementary Table 2. Assessed pygostyle fusion and relative body size for the extant avian specimens analyzed (referred to in *Pygostyle formation timeframe in multiple bird taxa*).** Relative ontogenetic stages of  $\mu$ CT-scanned immature bird specimens (top), skeletal specimen (middle) and histology-stained tissue specimens (bottom) and whether their pygostyles have completely fused. Fusion appears to occur medially to distally, so for some specimens, surface views were required, where for others, mid-sagittal views were sufficient. For LACM (Natural History Museum of Los Angeles County) skin specimens, tarsometatarsus length was used because it was the only outwardly measurable limb element. Developmental mode data follow [1] and was inferred based on [1, 2] and descriptions in [3] when data were unavailable. Skeletal maturity data follow [4] for *Dromaius novaehollandiae* and [5] for *Gallus gallus* (white leghorn).

| LACM CODE | TAXON                             | COMMON NAME             | CLADE         | TARSO-METATARSUS LENGTH (mm) | MEAN ADULT TARSO-METATARSUS LENGTH (mm) | % ADULT BODY SIZE          | COMPLETE FUSION? | DEVELOPMENTAL MODE |
|-----------|-----------------------------------|-------------------------|---------------|------------------------------|-----------------------------------------|----------------------------|------------------|--------------------|
| 110758    | <i>Anas platyrhynchos</i>         | Mallard                 | Galloanserae  | 19.9                         | 48.4                                    | 41.1%                      | No               | Precocial          |
| 111600    | <i>Aphelocoma californica</i>     | California scrub-jay    | Neoaves       | 37.2                         | 40.9                                    | 91.0%                      | Yes              | Super altricial    |
| 80368     | <i>Calidris minutilla</i>         | Least sandpiper         | Neoaves       | 17.7                         | 18.7                                    | 94.7%                      | No               | Precocial          |
| 111218    | <i>Chordeiles acutipennis</i>     | Lesser nighthawk        | Neoaves       | 13.6                         | 14.3                                    | 95.1%                      | No               | Semi altricial     |
| 85562     | <i>Eudromia elegans</i>           | Elegant crested-tinamou | Palaeognathae | 31.9                         | 48.3                                    | 66.0%                      | No               | Precocial          |
| 104451    | <i>Eurypyga helias</i>            | Sunbittern              | Neoaves       | 29.1                         | 50.1                                    | 58.1%                      | No               | Semi precocial     |
| 80241     | <i>Gallinago gallinago</i>        | Common snipe            | Neoaves       | 19.4                         | 32.0                                    | 60.6%                      | No               | Precocial          |
| 111461    | <i>Megascops kennicottii</i>      | Western screech owl     | Neoaves       | 26.5                         | 34.6                                    | 76.6%                      | No               | Altricial          |
| 6313      | <i>Melanerpes erythrocephalus</i> | Red-headed woodpecker   | Neoaves       | 25.4                         | 23.5                                    | 108.1%                     | Yes              | Altricial          |
| 85647     | <i>Perdica asiatica</i>           | Jungle bush-quail       | Galloanserae  | 8.0                          | 25.6                                    | 31.3%                      | No               | Precocial          |
| 109304    | <i>Thalasseus elegans</i>         | Elegant tern            | Neoaves       | 17.6                         | 29.1                                    | 60.5%                      | No               | Precocial          |
| 116139    | <i>Thalasseus elegans</i>         | Elegant tern            | Neoaves       | 27.7                         | 29.1                                    | 95.2%                      | Possibly         | Precocial          |
| LACM CODE | TAXON                             | COMMON NAME             | CLADE         | FEMUR LENGTH (mm)            | MEAN ADULT FEMUR LENGTH (mm)            | % ADULT BODY SIZE          | COMPLETE FUSION? | DEVELOPMENTAL MODE |
| 888834    | <i>Spheniscus humboldti</i>       | Humboldt penguin        | Neoaves       | 83.3                         | 82.2                                    | 101.3%                     | No               | Altricial          |
|           | TAXON                             | COMMON NAME             | CLADE         | AGE (days)                   | AGE AT SKELETAL MATURITY (days)         | % AGE AT SKELETAL MATURITY | COMPLETE FUSION? | DEVELOPMENTAL MODE |
|           | <i>Dromaius novaehollandiae</i>   | Emu                     | Palaeognathae | 105                          | 365                                     | 28.8%                      | No               | Precocial          |
|           | <i>Dromaius novaehollandiae</i>   | Emu                     | Palaeognathae | 165                          | 365                                     | 45.2%                      | No               | Precocial          |
|           | <i>Gallus gallus</i>              | Domestic chicken        | Galloanserae  | 8                            | 140                                     | 5.7%                       | No               | Precocial          |
|           | <i>Gallus gallus</i>              | Domestic chicken        | Galloanserae  | 58                           | 140                                     | 41.4%                      | No               | Precocial          |
|           | <i>Gallus gallus</i>              | Domestic chicken        | Galloanserae  | 64                           | 140                                     | 45.7%                      | No               | Precocial          |
|           | <i>Gallus gallus</i>              | Domestic chicken        | Galloanserae  | 88                           | 140                                     | 62.9%                      | No               | Precocial          |
|           | <i>Gallus gallus</i>              | Domestic chicken        | Galloanserae  | 105                          | 140                                     | 75.0%                      | No               | Precocial          |
|           | <i>Gallus gallus</i>              | Domestic chicken        | Galloanserae  | 126                          | 140                                     | 90.0%                      | No               | Precocial          |
|           | <i>Gallus gallus</i>              | Domestic chicken        | Galloanserae  | 168                          | 140                                     | 120.0%                     | Yes              | Precocial          |

1. Botelho, J.F., and Faunes, M. (2015). The evolution of developmental modes in the new avian phylogenetic tree. *Evolution & Development* 17, 221-223.
2. Rodewald, P. (2015). *The Birds of North America*. (Cornell Laboratory of Ornithology).
3. Dial, K.P. (2003). Evolution of avian locomotion: correlates of flight style, locomotor modules, nesting biology, body size, development, and the origin of flapping flight. *The Auk* 120, 941-952.
4. Regnault, S., Pitsillides, A.A., and Hutchinson, J.R. (2014). Structure, ontogeny and evolution of the patellar tendon in emus (*Dromaius novaehollandiae*) and other palaeognath birds. *PeerJ* 2, e711.
5. Church, L.E., and Johnson, L.C. (1964). Growth of long bones in the chicken. Rates of growth in length and diameter of the humerus, tibia, and metatarsus. *American Journal of Anatomy* 114, 521-538.
